# Supplementary material
Source: publisher site journal article supplement (https://www.dovepress.com/article/254617)
Supplement: Supplementary file 1 [file get_supplementary_file.php]

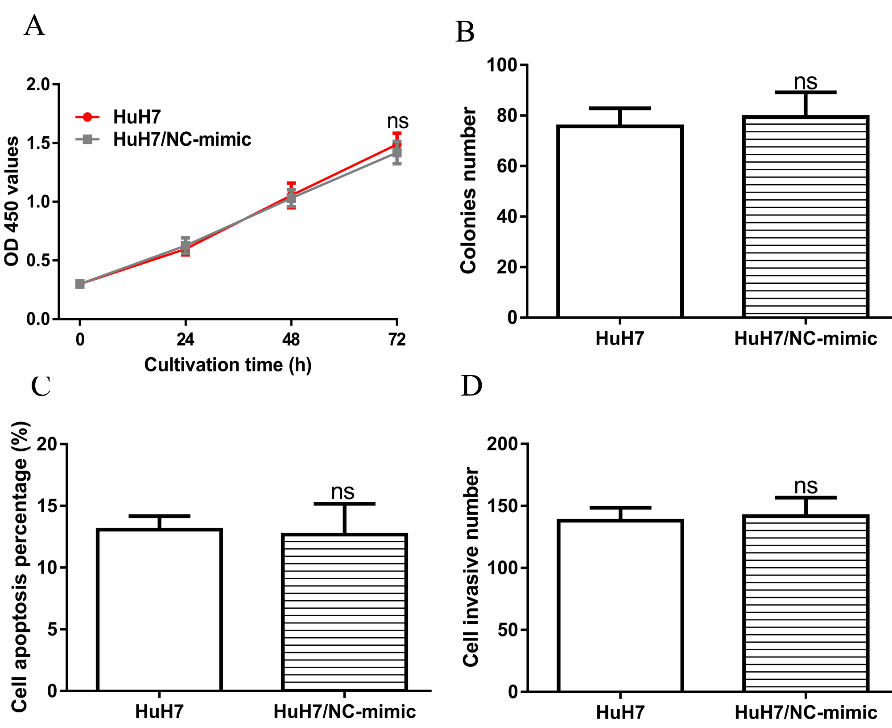


**Supplementary Figure 1.** Changes of cell behaviors in Huh-7 cells with or without NC-mimic transfection.

**Notes:** (**A**) Cell proliferation, (**B**) Colony formation, (**C**) Cell apoptosis, and (**D**) Cell invasion in Huh-7 cells with or without NC-mimic transfection.

**Abbreviations**: miR-133a-3p: microRNA-133a-3p; NC-mimic: negative control miRNA for miR-133a-3p mimic; ns, not significant.
